# Supplementary material
Source: Springer Nature journal article supplement (https://www.springermedizin.de/resource/supplementary/13030_2012_117_MOESM1_ESM.pdf/9644778)
Supplement: MOESM1 [file 9644778]

Potential participants assessed for eligibility (n=655)

Did not consent (n=11)  
Refused to participate (n=11)

Consented to participate (n=644)

Excluded (N=87)  
Did not completed the questionnaire (n=87)

Eligible (n=557)

Screening-negative IBS  
(n=414)

Screening-positive IBS  
(n=143)
